# Supplementary material
Source: HighWire-hosted journal article supplement (http://www.cmaj.ca/highwire/filestream/57647/field_highwire_adjunct_files/1/del-leduc-app_2.pdf)

**Appendix 2: Study flow** (as supplied by the authors)

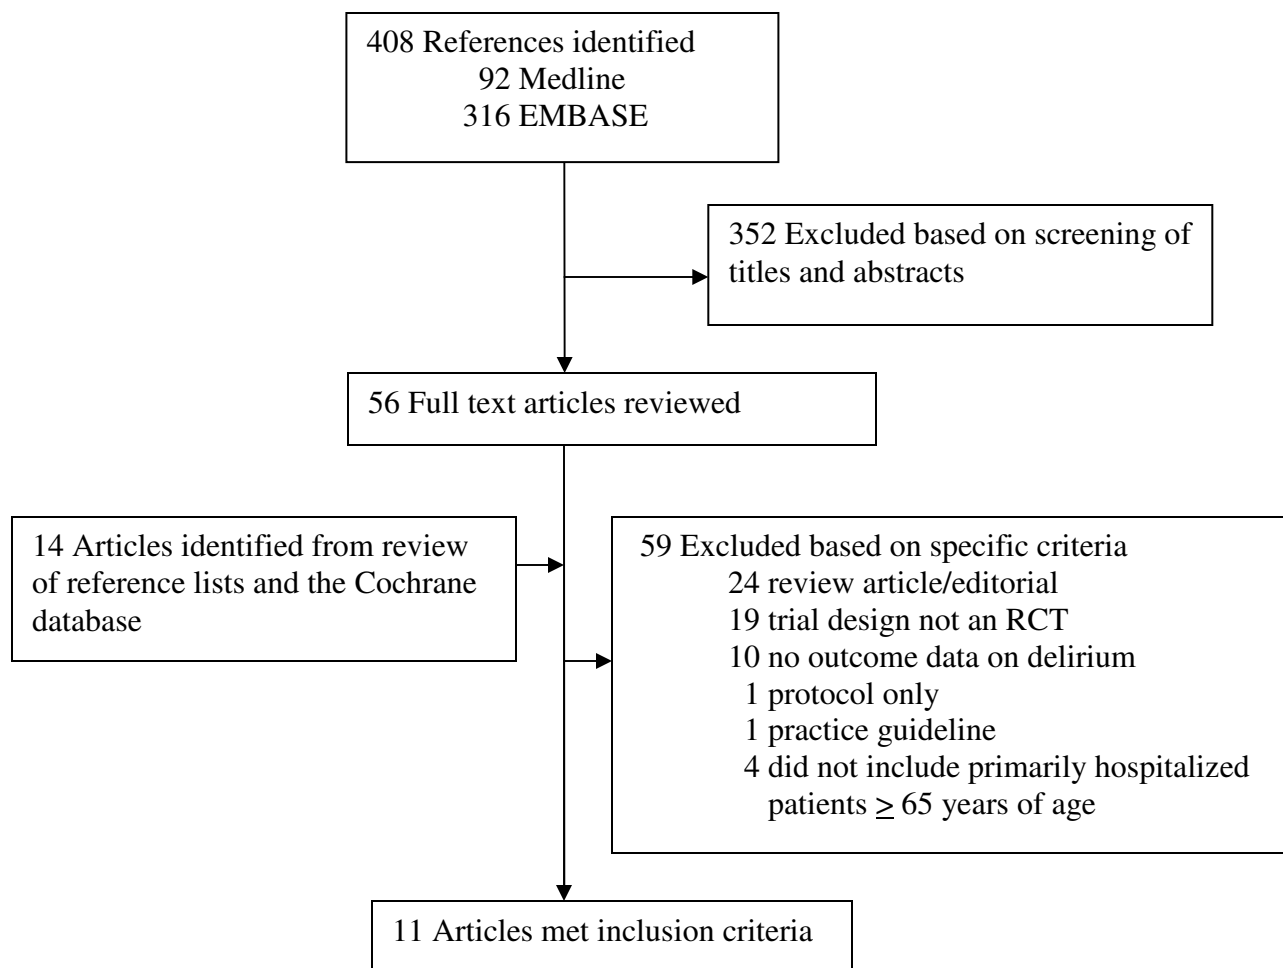

Supplement: del-leduc-app_2.pdf [file del-leduc-app_2.pdf]
